# Supplementary material for: Revealing chemical ordering in Pt–Co nanoparticles using electronic structure calculations and X-ray photoelectron spectroscopy
Source: Royal Society of Chemistry journal article supplement (doi:10.1039/c5cp01070e), 2015-01-01
Supplement: c5cp01070e1.pdf [file c5cp01070e1.pdf]

## Revealing chemical ordering in Pt-Co nanoparticles using electronic structure calculations and X-ray photoelectron spectroscopy

Gábor Kovács,<sup>a</sup> Sergey M. Kozlov,<sup>a</sup> Iva Matolínová,<sup>b</sup> Mykhailo Vorokhta,<sup>b</sup> Vladimír Matolín,<sup>b</sup>  
Konstantin M. Neyman<sup>\*a,c</sup>

<sup>a</sup> *Departament de Química Física and Institut de Química Teòrica i Computacional (IQTCUB),  
Universitat de Barcelona, c/ Martí i Franquès 1, 08028 Barcelona, Spain*

<sup>b</sup> *Department of Surface and Plasma Science, Charles University, V Holešovičkách 2, 18000 Prague, Czech  
Republic*

<sup>c</sup> *Institució Catalana de Recerca i Estudis Avançats (ICREA), 08010 Barcelona, Spain  
E-mail: konstantin.neyman@icrea.cat*

### Supplementary Information

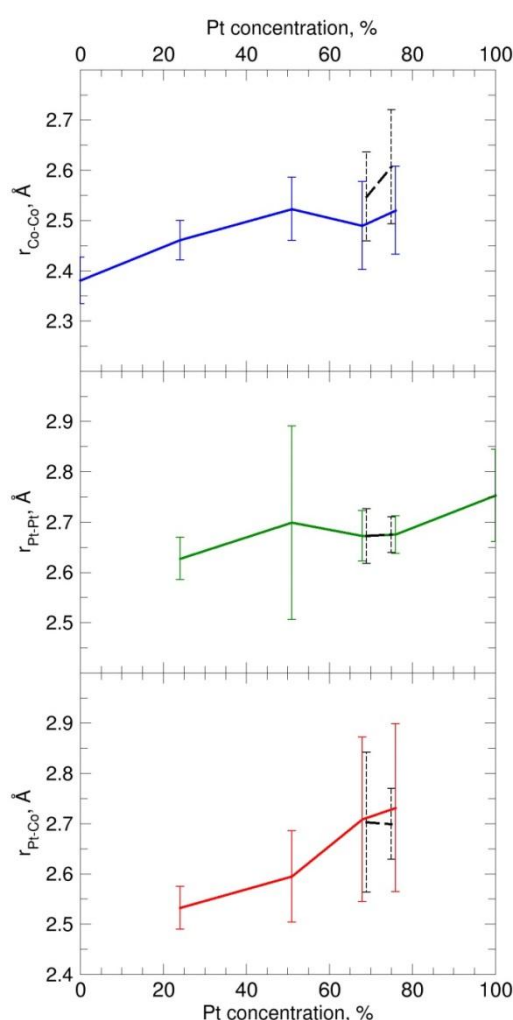

**Figure S1.** Calculated average nearest-neighbor distances ( $r_{\text{Co-Co}}$ ,  $r_{\text{Pt-Pt}}$  and  $r_{\text{Pt-Co}}$ ) in the global minimum structures of the bimetallic nanoparticles as a function of their Pt-Co composition. Colored and black dashed lines represent  $\text{Pt}_x\text{Co}_{79-x}$  and  $\text{Pt}_x\text{Co}_{140-x}$  nanoparticles, respectively. Error bars indicate the corresponding standard deviations ( $\sigma$ ).

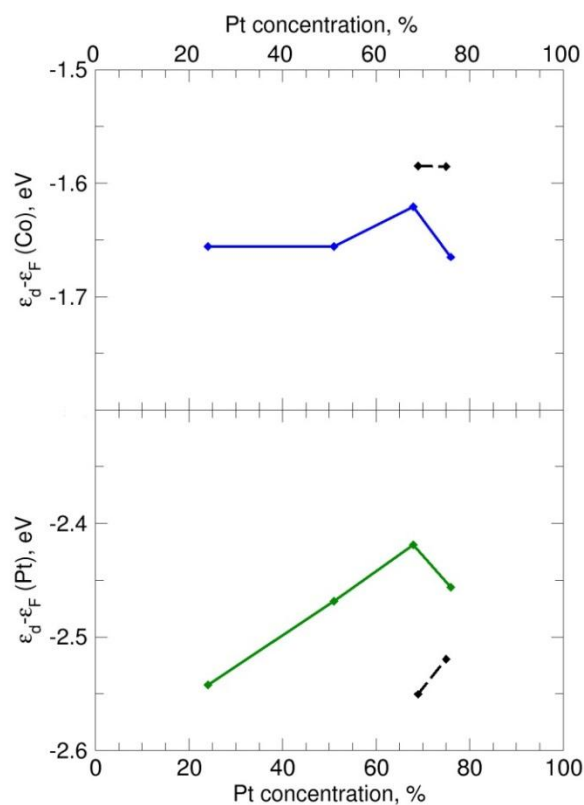

**Figure S2.** Calculated  $d$ -band center energies  $\epsilon_d$  of all Pt and Co atoms in Pt-Co nanoparticles of various size and composition with respect to the corresponding Fermi-level values  $\epsilon_F$ . Colored and black dashed lines show data for Pt<sub>x</sub>Co<sub>79-x</sub> and Pt<sub>x</sub>Co<sub>140-x</sub> nanoparticles, respectively.

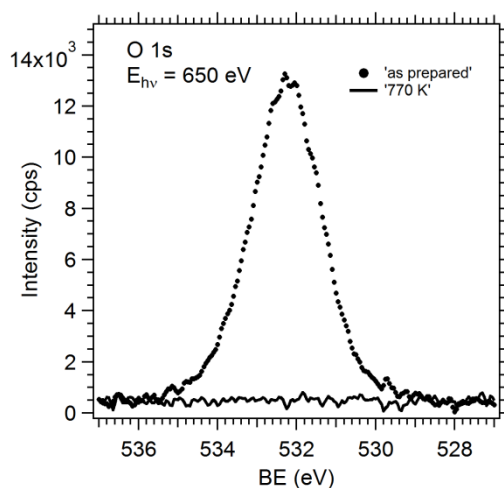

**Figure S3.** SXPES O 1s spectra of Pt-Co NP film, dotted line shows the spectrum of the “as prepared” sample, whereas the full line corresponds to the spectrum of the sample “after annealing”.

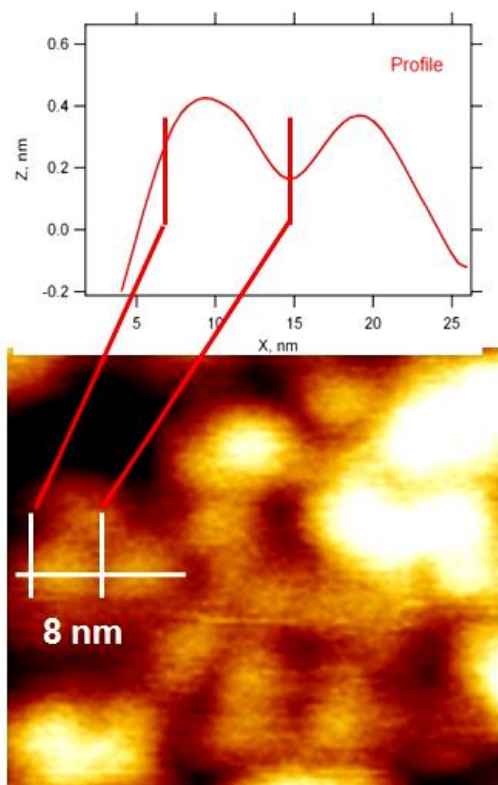

a)

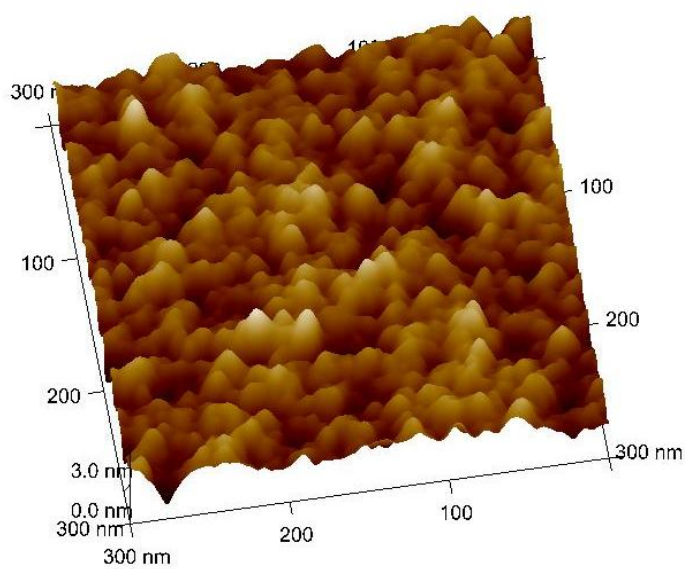

b)

**Figure S4.** a) AFM image of the annealed Pt-Co NP film with marked 8 nm particles and height profile; b) AFM image of the annealed PtCo NP film showing 3D structure of the catalyst film.
